# Supplementary material for: Nucleophilic attack at pyridine nitrogen and its use to access a novel mono-anionic ligand for iron-based ethylene polymerisation catalystsElectronic supplementary information (ESI) available: further characterisation data for 2a–5a. See http://www.rsc.org/suppdata/cc/b2/b203805f/
Source: Royal Society of Chemistry journal article supplement (doi:10.1039/b203805f), 2002-06-19
Supplement: b203805f.doc [file b203805f.doc]

**Supplementary Material (ESI) for Chemical Communications**

**This journal is © The Royal Society of Chemistry 2002**

**Experimental**. Unless otherwise stated, all reactions were performed under dinitrogen or argon by means of Schlenk techniques. Appropriately dried and degassed solvents were used. *d*6-2,6-diacetylpyridine was prepared by heating 2,6-diacetylpyridine (4.00 g) in ethanol-*d*1 and D2O at reflux for 48 hours, and recrystallizing from hexanes.

Li+(OEt2)[2,6-{*d*3-(2,6-Pri2C6H3N=C(Me))}2C5H3N(Me)]- (**2a**). To a slurry of **3** (1.00 g, 2.05 mmol) in Et2O (50 mL) at -78 C was added MeLi (1.5 mL, 2.4 mmol). Upon warming to room temperature, an intense blue colour developed. The solution was filtered through glass wool and concentrated to a smaller volume (approx. 20 mL). The solution was chilled to -78 C for 12 hours and deep blue crystals of **3a** deposited, which were washed with pentane (2 mL) and collected (0.78 g, 60% yield). 1H NMR (benzene-*d*6, 20 C):  7.10-7.00 (m, 6H, *aryl*), 6.90 (d, 2H, *meta-pyridyl*, *J*HH’ = 7.1 Hz), 5.41 (t, 1H, *para-pyridyl*, *J*HH’ = 7.1 Hz), 3.14 (q, 4H, OC*H*2, *J*HH’ = 7.2 Hz), 3.02, 2.84 (sept, 4H, C*H*Me2, *J*HH’ = 6.8 Hz), 2.48 (s, 3H, N-*Me*), 1.69 (m, residual CD2*H*), 1.15, 1.05, 0.99, 0.94 (d, 24H, CH*MeMe*’, *J*HH’ = 6.8 Hz), 1.08 (t, 6H, OCH2C*H*3, *J*HH’ = 7.2 Hz). 13C{1H} NMR (benzene-*d*6, 20 C):  166.5 (s, *C*=N), 150.5 (s, *ipso-aryl*), 135.0, 134.5 (s, *ortho-aryl*), 130.0 (s, *meta-pyridyl*), 125.0 124.8, 122.9 (s, *aryl*), 121.1 (s, *ortho-pyridyl*), 101.1 (s, *para-pyridyl*), 64.8 (s, O*C*H2), 40.0 (s, N-*Me*), 29.5, 29.0 (s, *C*HMe2), 24.7, 24.3, 24.0 (s, CH*Me*2), 15.9 (sept, *C*D3, *J*CD =19.2 Hz), 14.0 (s, OCH2*C*H3). 2H NMR (benzene, 20 C):  1.70 (s). Anal. Found for **2a**: C, 78.39; H, 8.08; N, 7.48%. Calcd for C38H50D6LiN3O: C, 78.13; H, 8.63; N, 7.20%.

Li+(OEt2)[2,6-{*d*3-(2,6-Et2C6H3N=C(Me))}2C5H3N(Me)]- (**3a**). As for **2a** (55% yield). 1H NMR (benzene-*d*6, 20 C):  7.10-7.00 (m, 6H, *aryl*), 6.90 (d, 2H, *meta-pyridyl*, *J*HH’ = 7.1 Hz), 5.52 (t, 1H, *para-pyridyl*, *J*HH’ = 7.1 Hz), 2.85 (q, 4H, OC*H*2, *J*HH’ = 7.2 Hz), 2.45, 2.32 (q, 8H, C*H*2CH3, *J*HH’ = 7.6 Hz), 2.40 (s, 3H, N-*Me*), 1.70 (m, residual CD2*H*), 1.16, 1.08 (t, 12H, CH2C*H*3, *J*HH’ = 7.6 Hz) 0.64 (t, 6H, OCH2C*H*3, *J*HH’ = 7.2 Hz). 13C{1H} NMR (benzene-*d*6, 20 C):  166.5 (s, *C*=N), 150.0 (s, *ipso-aryl*), 135.4, 134.4 (s, *ortho-aryl*), 130.2 (s, *meta-pyridyl*), 125.4 125.1, 123.0 (s, *aryl*), 119.9 (s, *ortho-pyridyl*), 100.6 (s, *para-pyridyl*), 64.8 (s, O*C*H2), 38.2 (s, N-*Me*), 24.6, 24.4 (s, *C*H2CH3), 24.7, 24.3, 24.0 (s, CH*Me*2), 14.8 (sept, *C*D3, *J*CD =19.3 Hz), 14.0 (s, OCH2*C*H3), 13.8 (s, CH2*C*H3). 2H NMR (benzene, 20 C):  1.70 (s). Anal. Found for **3a**: C, 77.05; H, 7.43; N, 8.16%. Calcd for C34H42D6LiN3O: C, 77.38; H, 8.02; N, 7.96%.

Li+(OEt2)[2,6-{*d*3-(2,6-Me2C6H3N=C(Me))}2C5H3N(Me)]- (**4a**). As for **2a** (53% yield). 1H NMR (benzene-*d*6, 20 C):  7.00-6.95 (m, 6H, *aryl*), 6.93 (d, 2H, *meta-pyridyl*, *J*HH’ = 7.1 Hz), 5.50 (t, 1H, *para-pyridyl*, *J*HH’ = 7.1 Hz), 2.92 (q, 4H, OC*H*2, *J*HH’ = 7.2 Hz), 2.37 (s, 3H, N-*Me*), 2.03, 1.94 (s, 12H, *Me*), 1.63 (m, residual CD2*H*), 0.73 (t, 6H, OCH2C*H*3, *J*HH’ = 7.2 Hz). 13C{1H} NMR (benzene-*d*6, 20 C):  166.2 (s, *C*=N), 151.2 (s, *ipso-aryl*), 136.9 (s, *ortho-aryl*), 130.2 (s, *meta-pyridyl*), 130.0, 129.0, 122.6 (s, *aryl*), 119.8 (s, *ortho-pyridyl*), 100.7 (s, *para-pyridyl*), 65.0 (s, O*C*H2), 37.9 (s, N-*Me*), 18.7, 18.6 (s, *Me*), 14.5 (s, OCH2*C*H3), 14.2 (sept, *C*D3). 2H NMR (benzene, 20 C):  1.60 (s). Anal. Found for **4a**: C, 76.27; H, 6.60; N, 8.73%. Calcd for C30H34D6LiN3O: C, 76.40; H, 7.27; N, 8.91%.

Li+(OEt2)[2,6-{*d*3-(2,4,6-Me3C6H2N=C(Me))}2C5H3N(Me)]- (**5a**). As for **2a** (11% yield). 1H NMR (benzene-*d*6, 20 C): 6.89 (d, 2H, *meta-pyridyl*, *J*HH’ = 7.1 Hz), 6.78 (s, 4H, aryl), 5.47 (t, 1H, *para-pyridyl*, *J*HH’ = 7.1 Hz), 2.92 (q, 4H, OC*H*2, *J*HH’ = 7.2 Hz), 2.36 (s, 3H, N-*Me*), 2.35, 1.89, 1.85 (s, 18H, *Me*), 1.61 (m, residual CD2*H*), 0.73 (t, 6H, OCH2C*H*3, *J*HH’ = 7.2 Hz). 13C{1H} NMR (benzene-*d*6, 20 C):  166.9 (s, *C*=N), 148.2 (s, *ipso-aryl*), 136.7, 136.0 (s, *ortho-aryl*), 131.6, 129.4, 128.9 (s, *aryl*), 130.8 (s, *meta-pyridyl*), 119.7 (s, *ortho-pyridyl*), 100.7 (s, *para-pyridyl*), 65.0 (s, O*C*H2), 37.2 (s, N-*Me*), 18.7, 18.6, 18.0 (s, *Me*), 14.5 (s, OCH2*C*H3), 14.3 (m, *C*D3). 2H NMR (benzene, 20 C):  1.60 (s). Anal. Found for **5a**: C, 77.48; H, 6.87; N, 9.15%. Calcd for C30H34D6LiN3O: C, 76.92; H, 7.66; N, 9.15%.
